# Supplementary material
Source: Springer Nature journal article supplement (https://www.springermedizin.de/resource/supplementary/12891_2006_260_MOESM2_ESM.pdf/9510880)

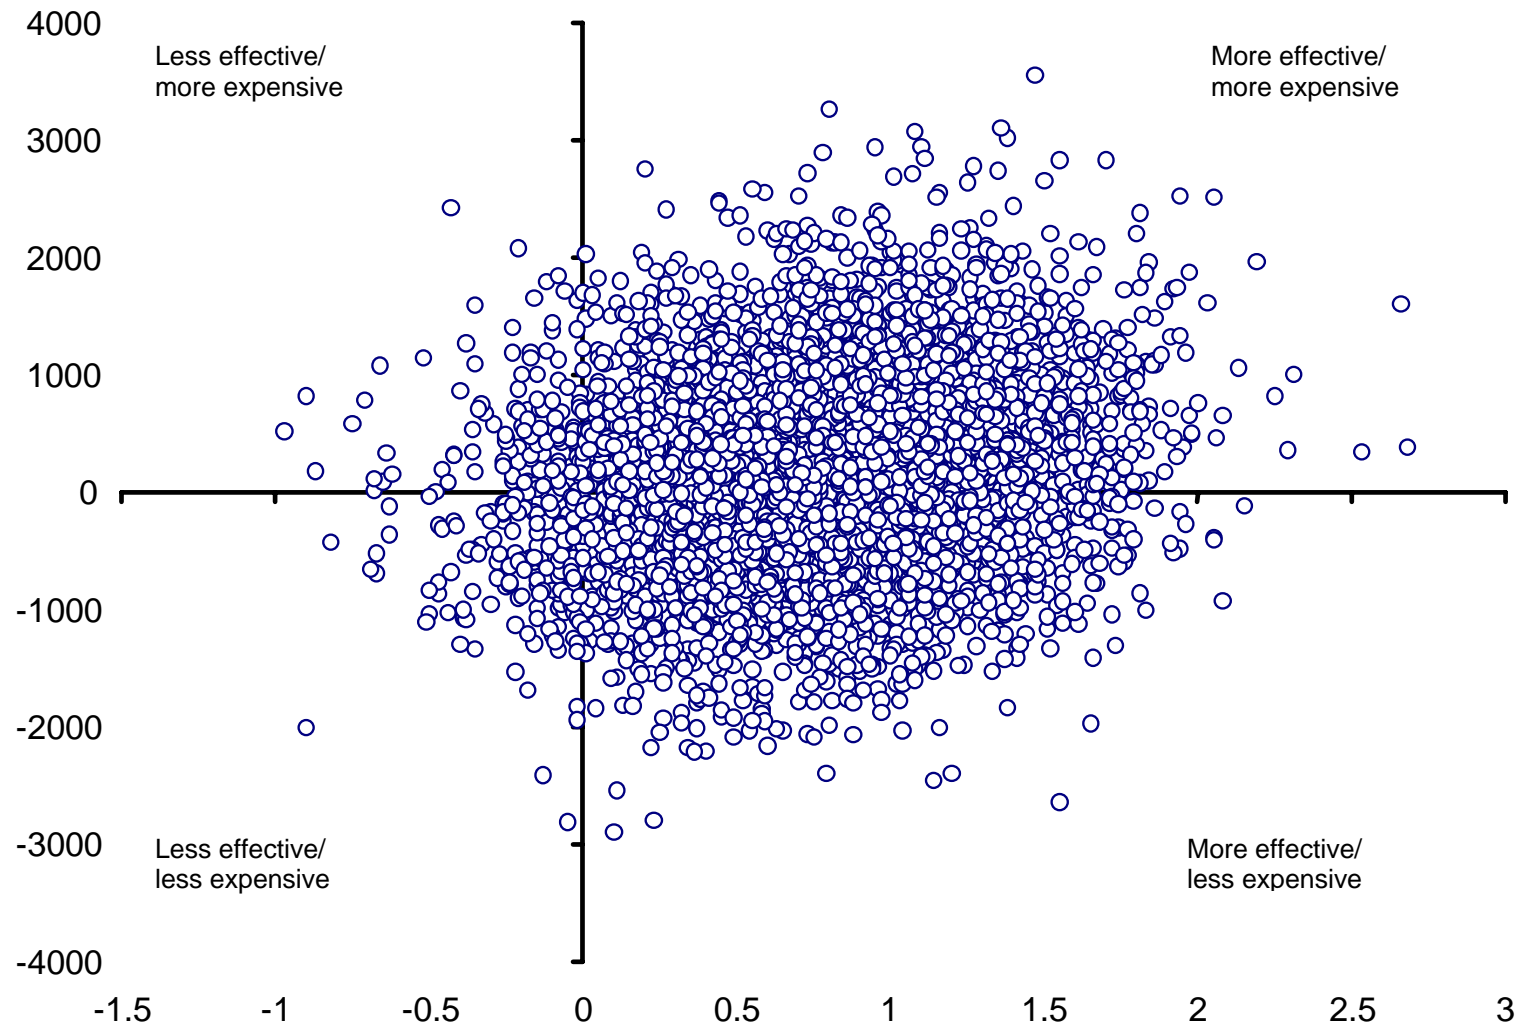

Supplement: MOESM2 [file 9510880]
